# Supplementary material for: Development and Validation of A Screening Tool for Sarcopenia in Community-dwelling Older Adults: A Diagnostic Cross-Sectional Study
Source: Research Square preprint supplement (doi:10.21203/rs.3.rs-7145614/v1), 2025-09-09
Supplement: Supplementary file 1 [file 7df131704fb0398dcdce8136.docx]

Subject ID：

**Investigation on the Prevalence of Sarcopenia among Community-Dwelling Older Adults and Analysis of Traditional Chinese Medicine Syndrome in Shanghai China**

**【version/date：V1.0/2023-01-03】**

**Questionnaire**

| **BIA test** | □ |
| --- | --- |
| **6M test** | □ |
| **Abbreviation of subject name：** | □ □ □ □ |
| **Subject ID：** | □ □ □ □ □ |

Subject ID：

**Filling instructions**

1．Fill in with a neutral pen or fountain pen。

2．The filling must be accurate and clear,must not be altered arbitrarily. When correcting errors, a horizontal line should be drawn in the center and sign the name of modifier and modifying time. Such as：~~58~~.~~6~~ 56.8 LGW 2012-01-20。

3.All selected items should be marked with “ **√** ” inside the □.for example ：☑. All columns in the table should be filled with corresponding text or numbers. Do not leave blank.

| **Research unit** | **Contacts** | **telephone** |
| --- | --- | --- |
| Shuguang hospital affiliated to Shanghai University of Traditional Chinese Medicine | Weian Yuan | 13774269261 |
| Ethics Committee of Shuguang hospital affiliated to Shanghai University of Traditional Chinese Medicine | Xi Geng | 021-20256070 |

Subject ID：

| **Epidemiology survey** |
| --- |

Date of Signing ICF ：20 y m d

| **Demographic characteristics** | | | | | |
| --- | --- | --- | --- | --- | --- |
| Date of birth | y m d | Gender | male□ female□ | Ethnicity |  |
| Marital status | unmarried□ married□ | Blood pressure | / mmHg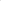 | Heart rate | /m |
| Height | cm | Weight | kg |  |  |
| Education | postgraduate□ undergraduate□ junior college□ high school□ junior high school□ primary school□ illiteracy□ others | | | | |

| **Disease history** |
| --- |
| Osteoporosis□ Chronic kidney disease□ COPD□ Diabetes □ Hypertension□  Heart failure □ Malignant tumor□ Hemiplegia □ Leukemia □ HIV/AIDS □ Others |

| **History of surgery** | | | |
| --- | --- | --- | --- |
| History of pacemaker implantation | □ | History of artificial joint implantation | □ |
| Others |  |  |  |

| **History of drug use** |
| --- |
| Osteoporosis related drugs (Calcium supplements□ Creatine supplements□ Vitamin D supplements□) Probiotics□ Glucocorticoids□ Others |

| **History of smoking** |
| --- |
| Smoking duration years Average number of cigarettes smoked (cigarettes/day)  How many year do you have quit smoking years (if you have quit,answer it) |

Subject ID：

| **History of alcohol intake** |
| --- |
| Drinking duration years frequency （times/day） consumption ml /day alcohol type  Years of abstinence from alcohol years (if you have quit, answer it) |

| **Dietary preferences** |
| --- |
| High protein diet□ vegetarians□ no special preferences □ |

| **Sleeping** |
| --- |
| Sleeping duration h/d |

| **Test** |
| --- |

| **Muscle strength** | |
| --- | --- |
| First time： kg | Second time: kg |

| **6-m usual gait speed** | |
| --- | --- |
| m/s（first time s） | m/s（second time s） |

Subject ID：

**SARC-Calf Scales**

| Strength | How much difﬁculty do you have in lifting and carrying 5 kg? | 0=no difficulty  1=some  2=a lot or unable |
| --- | --- | --- |
| Assistance in walking | How much difﬁculty do you have walking across a room? | 0=no difficulty  1=some  2=a lot, use aids, or unable |
| Rising from a chair | How much difﬁculty do you have transferring from a chair or bed? | 0=no difficulty  1=some  2=a lot or unable without help |
| Climb stairs | How much difﬁculty do you have climbing a ﬂight of 10 stairs? | 0=no difficulty  1=some  2=a lot or unable |
| Falls | How many times have you fallen in the past year? | 0= none  1= 1~3 falls  2=4 or more falls |
| calf circumference | Cm(Superior leg) | 0=males＞34cm ,females>33cm  10=males≤34cm ,females≤33cm |

**Note：**The sum of components serves as a score and ranges from 0 to 20 ,Participants deﬁned as having sarcopenia have a total SARC-CalF score of 11。

Subject ID：

**IPAQ-SF**

| 1 、 During the**last 7 days,** on how many days did you do vigorous physical activities like heavy lifting, digging, aerobics, or fast bicycling? |
| --- |
| _____ days per week □No vigorous physical activities →**Skip to question 3** |
| 2 、 How much time did you usually spend doing vigorous physical activities on one of those days? |
| _____ **hours per day** _____ **minutes per day** □ Don’t know/Not sure |
| 3 、 During the last 7 days, on how many days did you do moderate physical activities like carrying light loads, bicycling at a regular pace, or doubles tennis; Do not include walking. |
| _____ **days per week** □ No moderate physical activities **→ Skip to question 5** |
| 4 、How much time did you usually spend doing moderate physical activities on one of those days? |
| _____**hours per day**_____**minutes per day** □Don’t know/Not sure |
| 5 、During the last 7 days, on how many days did you walk for at least 10 minutes at a time? |
| _____**days per week** □ No walking **→ Skip to question 7** |
| 6 、How much time did you usually spend walking on one of those days? |
| _____**hours per day**_____**minutes per day** □ Don’t know/Not sure |
| 7 、During the last 7 days, how much time did you spend sitting on a week day? |
| _____ **hours per day** _____ **minutes per day** □ Don’t know/Not sure |

**Rating criteria：**

**1 、High. Meet any of the following two criteria**：（1）the total amount of vigorous physical activity is ≥3d,and the total weekly MET energy expenditure ≥1500MET-min/week.(2)the total amount of 3 kind intensities of physical activity is ≥7d, and the total weekly MET energy expenditure is ≥3000MET min/week

**2 、Moderate.Meet any of the following three criteria**：（1）at least 20min of any vigorous physical activities per day, totally ≥3d.(2) at least 30 min of any moderate and/or walking activities per day, totally ≥5d.(3)the total amount of 3 kind intensities of physical activity is ≥5d, and the total weekly MET energy expenditure is ≥600MET min/week

**3 、low.**（1）report none activity.（2）report some activities,but don’t meet the above criteria for moderate and high group.

Subject ID：

| **BIA test** |
| --- |

Pasting report here

Subject ID：

| **Summary of the investigation** |
| --- |

**Has the patient completed the investigation？ □YES □NO**

**if not,please fill the reason**

**Date of withdraw：20 y m d**

**Reason for withdraw：**

**□ 1. withdraw informed consent form**

**□ 2. others:**

**Investigator(signature): Date: 20 y m d**
