# Supplementary material for: Development and Validation of A Screening Tool for Sarcopenia in Community-dwelling Older Adults: A Diagnostic Cross-Sectional Study
Source: Research Square preprint supplement (doi:10.21203/rs.3.rs-7145614/v1), 2025-09-09
Supplement: Supplementary file 2 [file d5f66e5689550a8cc5a26953.docx]

Supplemental Online Content

eTable 1. Participants Demographic and Clinical Characteristics of all participants

eTable 2. Univariate logistic regression of sarcopenia and candidate predictors in the training set

eTable 3. Evaluation indicators of multiple logistic regression models

eFig 1. Performance and validation of prediction model in training dataset(first two) ,and validation dataset(last one)

eTable 1. Participants Demographic and Clinical Characteristics of all participants

| **Characteristic** | **N** | **Overall,**  **N = 2,4531** | **Non-sarcopenia,**  **N = 2,1081** | **Sarcopenia,**  **N = 3451** | **p-value**2 |
| --- | --- | --- | --- | --- | --- |
| **Community** | 2,453 |  |  |  | **<0.001** |
| Bei Cai |  | 327 (100.0%) | 293 (89.6%) | 34 (10.4%) |  |
| Hang Tou |  | 1,900 (100.0%) | 1,657 (87.2%) | 243 (12.8%) |  |
| Kang Qiao |  | 160 (100.0%) | 96 (60.0%) | 64 (40.0%) |  |
| Zhang Jiang |  | 66 (100.0%) | 62 (93.9%) | 4 (6.1%) |  |
| **Age(mean(SD),y)** | 2,453 | 72.55(6.23) | 71.76(5.64) | 77.37(7.35) | **<0.001** |
| **Sex** | 2,453 |  |  |  | 0.100 |
| Male |  | 1,038 (100.0%) | 878 (84.6%) | 160 (15.4%) |  |
| Female |  | 1,415 (100.0%) | 1,230 (86.9%) | 185 (13.1%) |  |
| **Marriage** | 2,453 |  |  |  | >0.999 |
| Married |  | 2,450 (100.0%) | 2,105 (85.9%) | 345 (14.1%) |  |
| Never-married |  | 3 (100.0%) | 3 (100.0%) | 0 (0.0%) |  |
| **Height(mean(SD),cm)** | 2,453 | 157.19(8.32) | 157.73(8.15) | 153.90(8.63) | **<0.001** |
| **Weight(mean(SD),kg)** | 2,453 | 60.81(10.21) | 62.22(9.88) | 52.16(7.59) | **<0.001** |
| **BMI(mean(SD),kg/m)** | 2,453 | 24.57(3.43) | 24.99(3.36) | 22.02(2.65) | **<0.001** |
| **Systolic blood pressure (mean(SD),mmHg)** | 2,453 | 140.21(17.00) | 140.16(16.84) | 140.48(17.99) | 0.512 |
| **Diastolic blood pressure (mean(SD),mmHg)** | 2,453 | 77.94(10.10) | 78.20(9.95) | 76.37(10.83) | **0.001** |
| **Heart rate (mean(SD),bpm)** | 2,453 | 77.61(10.63) | 77.64(10.39) | 77.48(11.97) | 0.486 |
| **Education** | 2,402 |  |  |  | 0.656 |
| Below middle school |  | 1,396 (100.0%) | 1,201 (86.0%) | 195 (14.0%) |  |
| Middle school and above |  | 1,006 (100.0%) | 859 (85.4%) | 147 (14.6%) |  |
| **History of chronic diseases** | 2,453 |  |  |  | 0.752 |
| No |  | 616 (100.0%) | 527 (85.6%) | 89 (14.4%) |  |
| Yes |  | 1,837 (100.0%) | 1,581 (86.1%) | 256 (13.9%) |  |
| **Osteoporosis** | 2,453 |  |  |  | **<0.001** |
| No |  | 2,380 (100.0%) | 2,059 (86.5%) | 321 (13.5%) |  |
| Yes |  | 73 (100.0%) | 49 (67.1%) | 24 (32.9%) |  |
| **CKD** | 2,453 |  |  |  | 0.722 |
| No |  | 2,436 (100.0%) | 2,094 (86.0%) | 342 (14.0%) |  |
| Yes |  | 17 (100.0%) | 14 (82.4%) | 3 (17.6%) |  |
| **COPD** | 2,453 |  |  |  | 0.512 |
| No |  | 2,433 (100.0%) | 2,092 (86.0%) | 341 (14.0%) |  |
| Yes |  | 20 (100.0%) | 16 (80.0%) | 4 (20.0%) |  |
| **Diabetes** | 2,453 |  |  |  | 0.376 |
| No |  | 2,028 (100.0%) | 1,737 (85.7%) | 291 (14.3%) |  |
| Yes |  | 425 (100.0%) | 371 (87.3%) | 54 (12.7%) |  |
| **Hypertension** | 2,453 |  |  |  | **0.035** |
| No |  | 1,137 (100.0%) | 959 (84.3%) | 178 (15.7%) |  |
| Yes |  | 1,316 (100.0%) | 1,149 (87.3%) | 167 (12.7%) |  |
| **Heart failure** | 2,453 |  |  |  | 0.532 |
| No |  | 2,448 (100.0%) | 2,104 (85.9%) | 344 (14.1%) |  |
| Yes |  | 5 (100.0%) | 4 (80.0%) | 1 (20.0%) |  |
| **Malignancy** | 2,453 |  |  |  | 0.244 |
| No |  | 2,378 (100.0%) | 2,047 (86.1%) | 331 (13.9%) |  |
| Yes |  | 75 (100.0%) | 61 (81.3%) | 14 (18.7%) |  |
| **Surgery** | 2,453 |  |  |  | 0.174 |
| No |  | 1,566 (100.0%) | 1,357 (86.7%) | 209 (13.3%) |  |
| Yes |  | 887 (100.0%) | 751 (84.7%) | 136 (15.3%) |  |
| **Medication** | 2,452 |  |  |  | 0.781 |
| No |  | 762 (100.0%) | 657 (86.2%) | 105 (13.8%) |  |
| Yes |  | 1,690 (100.0%) | 1,450 (85.8%) | 240 (14.2%) |  |
| **Smoking** | 2,453 |  |  |  | **0.033** |
| No |  | 2,019 (100.0%) | 1,721 (85.2%) | 298 (14.8%) |  |
| Yes |  | 434 (100.0%) | 387 (89.2%) | 47 (10.8%) |  |
| **Drinking** | 2,452 |  |  |  | 0.847 |
| No |  | 2,133 (100.0%) | 1,834 (86.0%) | 299 (14.0%) |  |
| Yes |  | 319 (100.0%) | 273 (85.6%) | 46 (14.4%) |  |
| **Duration of sleep**  **(mean(SD),h)** | 2,453 | 6.79(1.52) | 6.79(1.48) | 6.80(1.74) | 0.784 |
| **Food habit** | 2,453 |  |  |  | **0.035** |
| No special |  | 2,273 (100.0%) | 1,960 (86.2%) | 313 (13.8%) |  |
| Vegetarian |  | 141 (100.0%) | 120 (85.1%) | 21 (14.9%) |  |
| High protein diet |  | 39 (100.0%) | 28 (71.8%) | 11 (28.2%) |  |
| **Data set** | 2,453 |  |  |  | 0.862 |
| Training set |  | 1,718 (100.0%) | 1,475 (85.9%) | 243 (14.1%) |  |
| Validation set |  | 735 (100.0%) | 633 (86.1%) | 102 (13.9%) |  |
| **Calf circumference**  **(mean(SD),cm)** | 2,453 | 33.35(3.00) | 33.76(2.88) | 30.80(2.37) | **<0.001** |
| 1n (%); Mean(SD) | | | | | |
| 2Pearson's Chi-squared test; Wilcoxon rank sum test; Fisher's exact test | | | | | |

**eTable 2 Univariate logistic regression of sarcopenia and candidate predictors in the training set**

| **Characteristic** | **Description** | | | **Univariate Logistic regression** | | |
| --- | --- | --- | --- | --- | --- | --- |
| **All** | **Non-sarcopenia**, N = 1,475 | **Sarcopenia**,  N = 243 | **OR** | **95% CI** | **p-value** |
| **Age(y)** | 1,718 | 71.91(5.70) | 77.40(7.23) | 1.14 | 1.12, 1.17 | **<0.001** |
| **Sex** | 1,718 |  |  | 0.76 | 0.58, 1.00 | **0.052** |
| Male |  | 600 (40.7%) | 115 (47.3%) |  |  |  |
| Female |  | 875 (59.3%) | 128 (52.7%) |  |  |  |
| **Height(cm)** | 1,718 | 157.55(8.12) | 153.78(8.49) | 0.95 | 0.93, 0.96 | **<0.001** |
| **Weight(kg)** | 1,718 | 62.10(9.64) | 52.12(7.56) | 0.87 | 0.85, 0.89 | **<0.001** |
| **BMI(kg/m2)** | 1,718 | 25.01(3.37) | 22.04(2.66) | 0.72 | 0.68, 0.76 | **<0.001** |
| **Systolic bloodpressure (mmHg)** | 1,718 | 140.45(17.20) | 140.66(18.08) | 1.00 | 0.99, 1.01 | 0.859 |
| **Diastolic blood pressure (mmHg)** | 1,718 | 78.31(10.14) | 75.84(10.27) | 0.98 | 0.96, 0.99 | **<0.001** |
| **Heart rate(bpm)** | 1,718 | 77.89(10.48) | 76.98(11.67) | 0.99 | 0.98, 1.00 | 0.216 |
| **Education** | 1,686 |  |  | 0.96 | 0.73, 1.27 | 0.773 |
| Below middle school |  | 857 (59.3%) | 146 (60.3%) |  |  |  |
| Middle school and above |  | 587 (40.7%) | 96 (39.7%) |  |  |  |
| **History of chronic diseases** | 1,718 |  |  | 0.92 | 0.68, 1.26 | 0.594 |
| No |  | 359 (24.3%) | 63 (25.9%) |  |  |  |
| Yes |  | 1,116 (75.7%) | 180 (74.1%) |  |  |  |
| **Osteoporosis** | 1,718 |  |  |  |  |  |
| No |  | 1,440 (97.6%) | 226 (93.0%) | — | — |  |
| Yes |  | 35 (2.4%) | 17 (7.0%) | 3.09 | 1.67, 5.54 | **<0.001** |
| **CKD** | 1,718 |  |  |  |  |  |
| No |  | 1,467 (99.5%) | 241 (99.2%) | — | — |  |
| Yes |  | 8 (0.5%) | 2 (0.8%) | 1.52 | 0.23, 6.12 | 0.597 |
| **COPD** | 1,718 |  |  |  |  |  |
| No |  | 1,464 (99.3%) | 239 (98.4%) | — | — |  |
| Yes |  | 11 (0.7%) | 4 (1.6%) | 2.23 | 0.61, 6.57 | 0.173 |
| **Diabetes** | 1,718 |  |  |  |  |  |
| No |  | 1,211 (82.1%) | 206 (84.8%) | — | — |  |
| Yes |  | 264 (17.9%) | 37 (15.2%) | 0.82 | 0.56, 1.18 | 0.311 |
| **Hypertension** | 1,718 |  |  |  |  |  |
| No |  | 685 (46.4%) | 128 (52.7%) | — | — |  |
| Yes |  | 790 (53.6%) | 115 (47.3%) | 0.78 | 0.59, 1.02 | **0.072** |
| **Heart failure** | 1,718 |  |  |  |  |  |
| No |  | 1,473 (99.9%) | 242 (99.6%) | — | — |  |
| Yes |  | 2 (0.1%) | 1 (0.4%) | 3.04 | 0.14, 31.9 | 0.364 |
| **Malignancy** | 1,718 |  |  |  |  |  |
| No |  | 1,433 (97.2%) | 234 (96.3%) | — | — |  |
| Yes |  | 42 (2.8%) | 9 (3.7%) | 1.31 | 0.59, 2.61 | 0.467 |
| **Smoking** | 1,718 |  |  | 0.73 | 0.49, 1.06 | 0.114 |
| No |  | 1,207 (81.8%) | 209 (86.0%) |  |  |  |
| Yes |  | 268 (18.2%) | 34 (14.0%) |  |  |  |
| **Drinking** | 1,717 |  |  | 1.10 | 0.73, 1.62 | 0.634 |
| No |  | 1,290 (87.5%) | 210 (86.4%) |  |  |  |
| Yes |  | 184 (12.5%) | 33 (13.6%) |  |  |  |
| **Duration of sleep(h)** | 1,718 | 6.81(1.50) | 6.87(1.69) | 1.03 | 0.94, 1.12 | 0.536 |
| **Food habit** | 1,718 |  |  |  |  |  |
| No special |  | 1,377 (93.4%) | 220 (90.5%) | — | — |  |
| Vegetarian |  | 82 (5.6%) | 15 (6.2%) | 1.14 | 0.63, 1.96 | 0.641 |
| High protein diet |  | 16 (1.1%) | 8 (3.3%) | 3.13 | 1.26, 7.20 | **0.009** |
| **Sitting duration time(h)** | 1,718 | 4.92(1.86) | 5.31(1.97) | 1.12 | 1.04, 1.21 | **0.003** |
| **Physical activity_degree** | 1,717 |  |  |  |  |  |
| Low |  | 96 (6.5%) | 32 (13.2%) | — | — |  |
| Moderate |  | 626 (42.5%) | 112 (46.1%) | 0.54 | 0.35, 0.85 | **0.006** |
| High |  | 752 (51.0%) | 99 (40.7%) | 0.39 | 0.25, 0.63 | **<0.001** |
| **Calf circumference(cm)** | 1,718 | 33.75(2.79) | 30.80(2.25) | 0.64 | 0.60, 0.69 | **<0.001** |

**eTable 3. Evaluation indicators of multiple logistic regression models**

| **Models** | **Training Data Set** | | | | | | |
| --- | --- | --- | --- | --- | --- | --- | --- |
| **AIC** | **BIC** | **Tjur’s R2** | **Likelihood**  **Ratio test** | | **Wald test** | |
| **value** | **p value** | **value** | **p value** |
| Model 1 | 997.14 | 1035.29 | 0.277 | 417.29 | <0.001 | 41.36 | <0.001 |
| Model 2 | 1002.52 | 1029.76 | 0.269 | 407.91 | <0.001 | 61.74 | <0.001 |

| 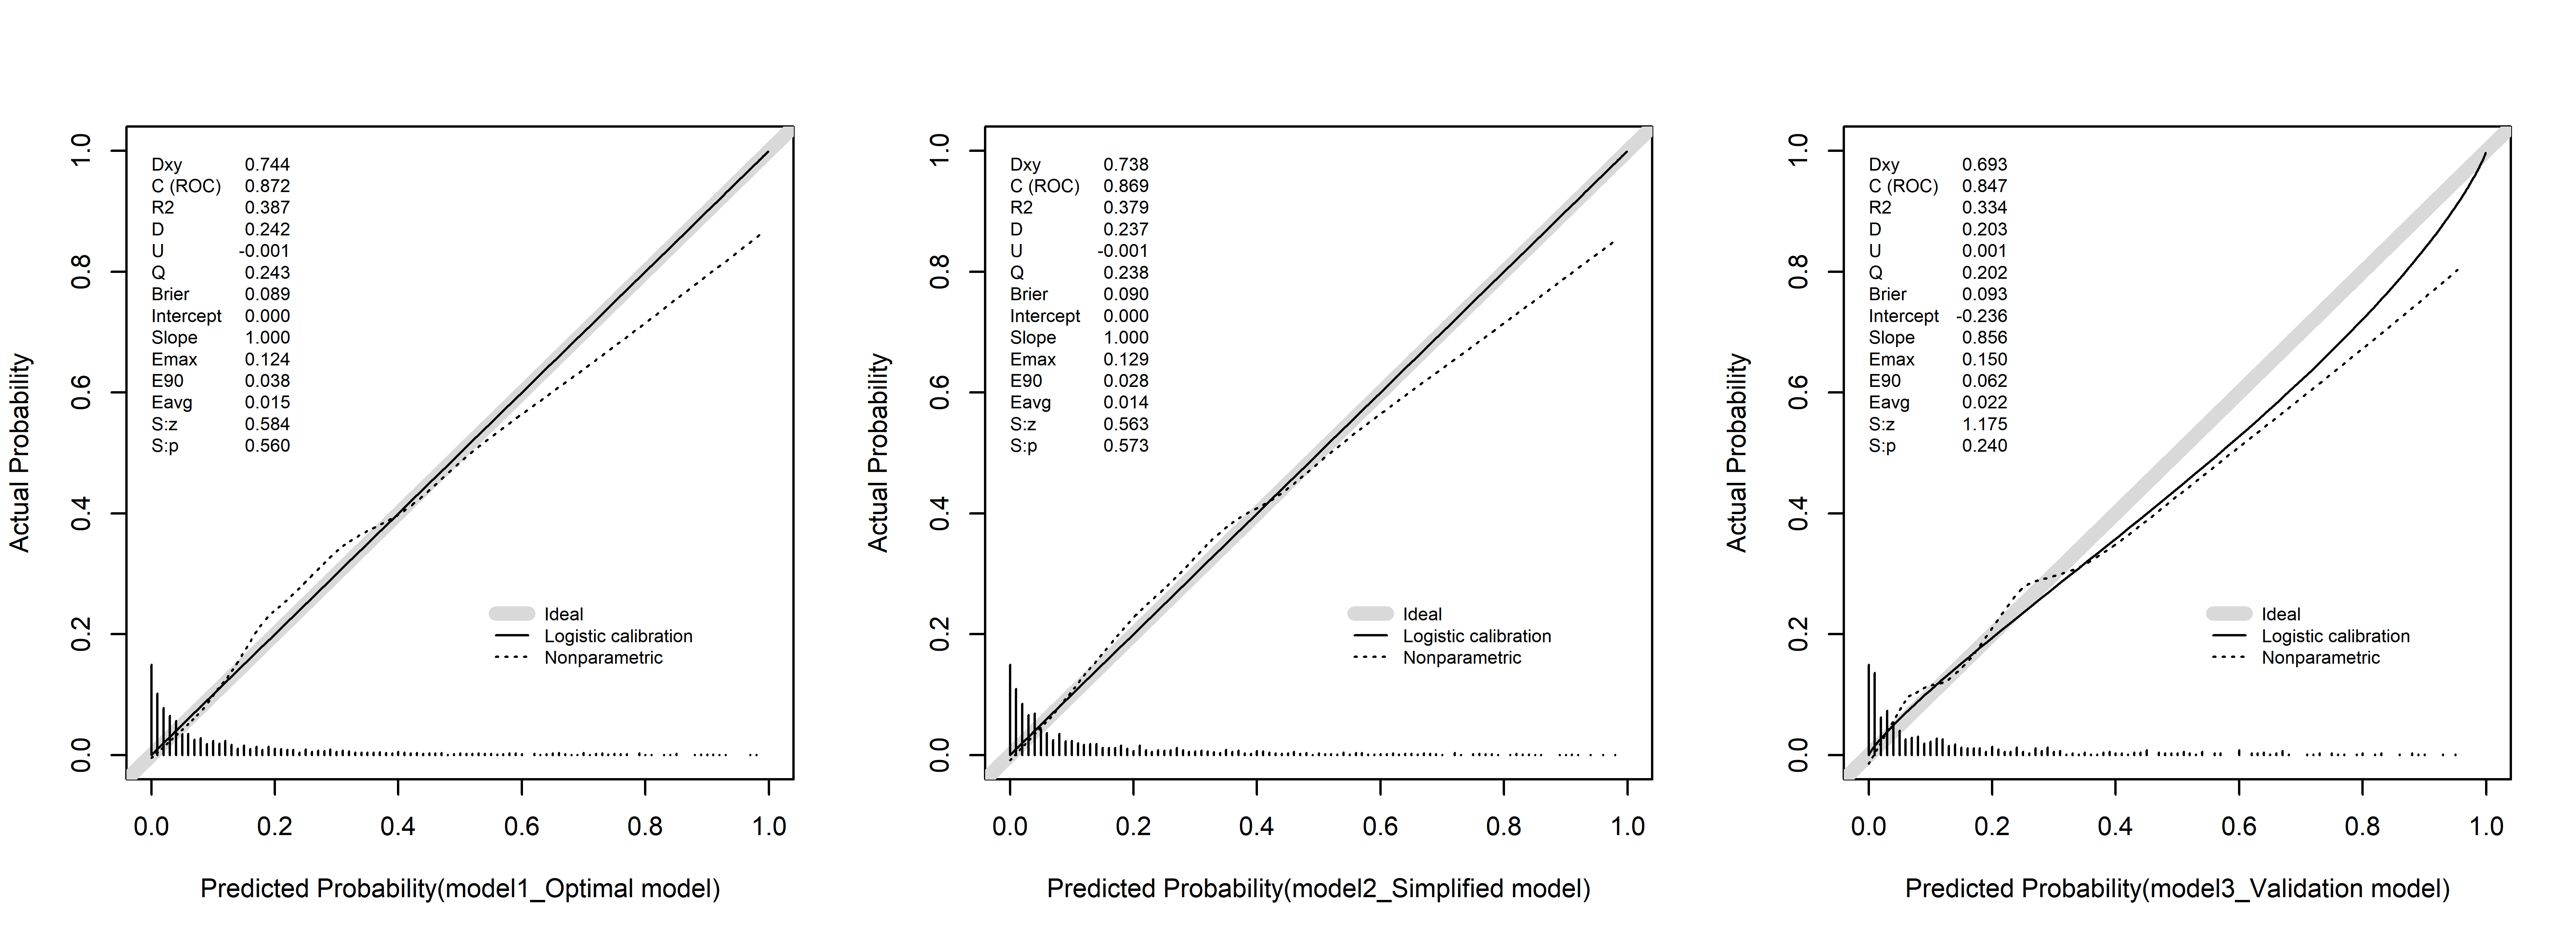 |
| --- |
| **eFig1. Performance and validation of prediction model in training datasets(first two) ,validation datasets(last one)** |
